# Supplementary material for: Model systems for flavoenzyme activity: flavin-functionalised SAMs as models for probing redox modulation through hydrogen bondingElectronic supplementary information (ESI) available: synthesis and spectroscopic details; cyclic voltammograms. See http://www.rsc.org/suppdata/cc/b3/b307980p/
Source: Royal Society of Chemistry journal article supplement (doi:10.1039/b307980p), 2003-01-01
Supplement: b307980p.doc [file b307980p.doc]

## Electronic Supplementary Information

Model systems for flavoenzyme activity: flavin-functionalised SAMs as models for probing redox modulation through hydrogen bonding

Graeme Cooke,*a Florence M. A. Duclairoir,a Phillip John,a Neil Polwart,a Vincent M. Rotellob

aCentre for Biomimetic Design & Synthesis, Chemistry,William H. Perkin Building, School of Engineering & Physical Sciences, Heriot-Watt University, Riccarton, Edinburgh, EH14 4AS, UK.

*bDepartment of Chemistry, University of Massachusetts at Amherst, Amherst, MA 01002, USA.*


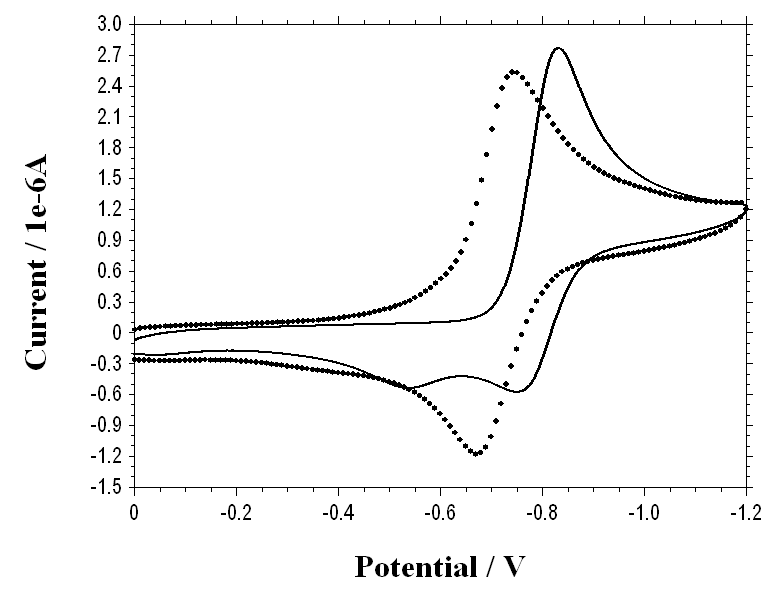


Cyclic voltammogramms of a solution of flavin **3** (___) and in the presence of excess **2** (…..). Scan rate = 100 mV s-1.


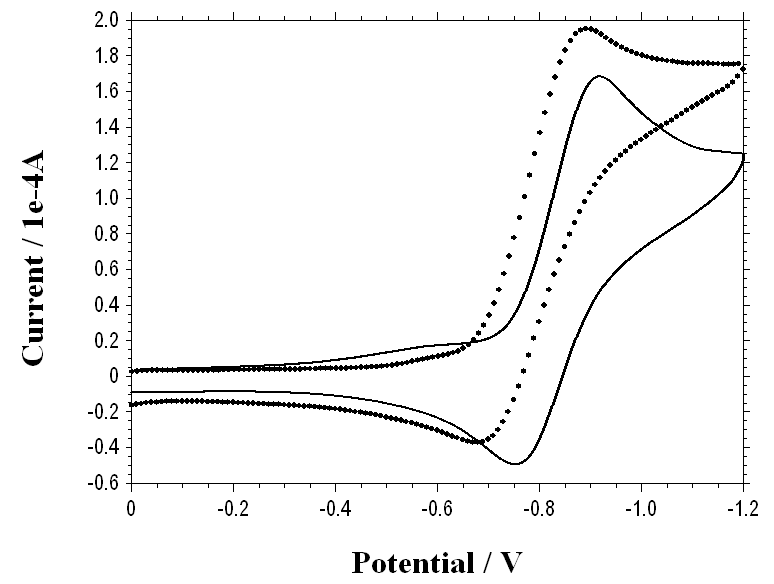


Cyclic voltammogramms of SAMs of flavin **3** (___) and in the presence of excess **2** (…..). Scan rate = 500 mV s-1.


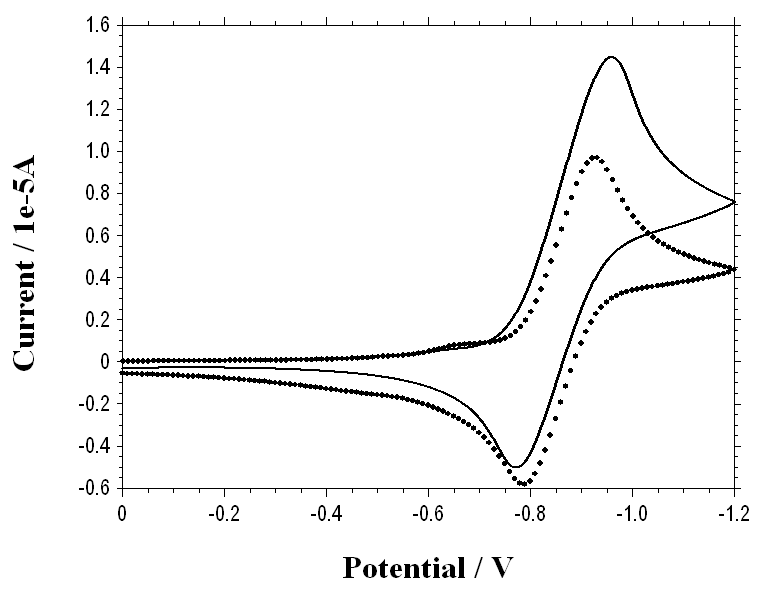


Cyclic voltammogramms of a solution of flavin **4**  (___) and in the presence of excess **2** (…..). Scan rate = 100 mV s-1.


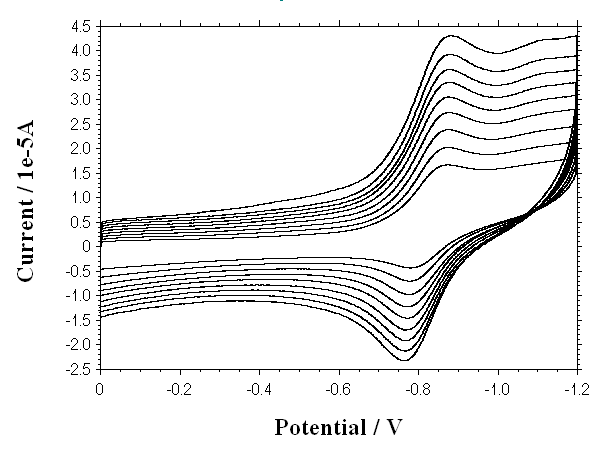


Cyclic voltammogramms of co-SAMs of flavin **3** and butyl disulfide recorded at different scan rates: 0.2 (smallest current), 0.3, 0.4, 0.5, 0.6, 0.7, 0.8, 0.9, 1.0 Vs-1 (largest current).


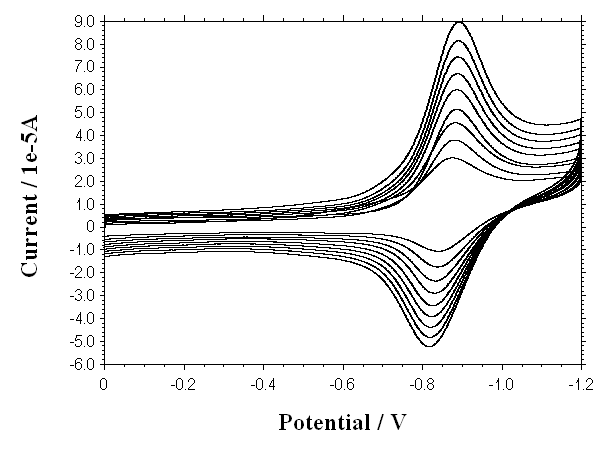


Cyclic voltammogramms of co-SAMs of flavin **4** and butyl disulfide recorded at different scan rates: 0.2 (smallest current), 0.3, 0.4, 0.5, 0.6, 0.7, 0.8, 0.9, 1.0 Vs-1 (largest current).


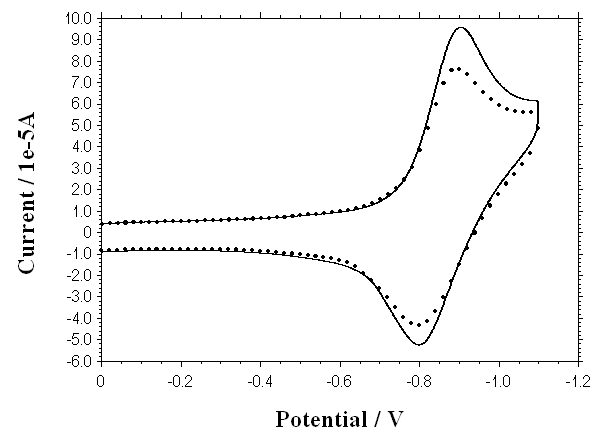


Cyclic voltammogramms of co-SAMs of flavin **4** and butyl disulfide (___) and in the presence of excess **2** (…..). Scan rate = 500 mV s-1.


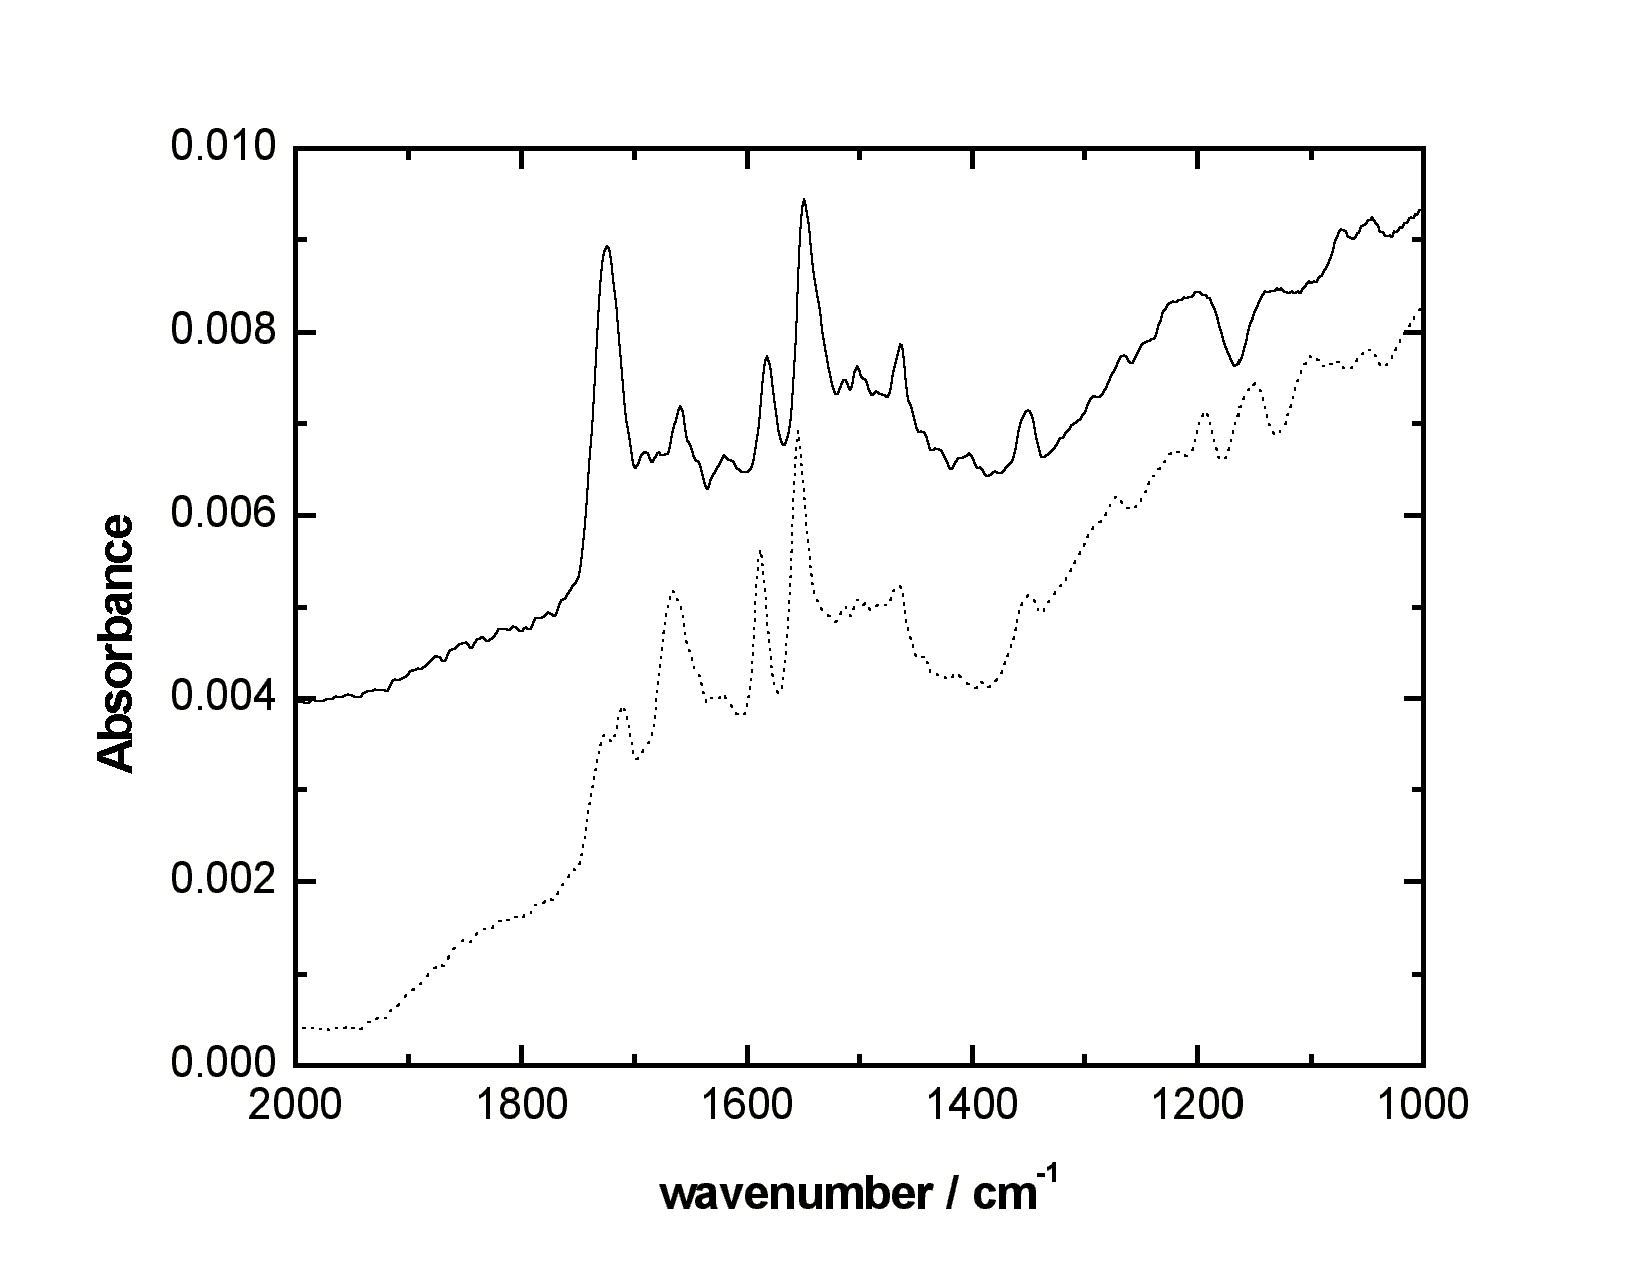


Portion of RAIR spectra of flavins **3** (___) and **4** (……).

The reflection–absorption-IR spectra (RAIRs) were recorded on a Brüker IFS 66v/S spectrometer, equipped with a variable angle infra-red reflection accessory set at 80o. The spectra were measured using a liquid nitrogen cooled MCT detector. The measurement chamber was evacuated (P = 0.004 mbar) during the measurements. 500 Scans with 4 cm-1 resolution were performed to obtain the spectra. The gold substrates consisted of 200 nm of vapour-deposited Au on top of glass microscope slide. Monolayers of **3** or **4** were prepared by immersing the gold slide into a 10-5 M solution of the disulfide for 24 h. When the gold slides were removed from solution, they were thoroughly rinsed with MeCN and then THF and dried under high-vacuum for 1 h.

Cyclic voltammetry experiments have allowed an estimation of the surface coverage () for SAMs of **3**  to be determined

(= 2 x 10-10 mol cm-2). However, this value should be treated as an estimate due to difficulties in accurately determining the

surface area of the gold-wire electrode. The peak half-width ( Efwhm) for this monolayer has also been determined, and was found

to be 150 mV. This is considerably larger than the ideal 90 mV, and is presumably a consequence of multiple flavin

microenvironments within the SAM.

#### Synthesis of compound 3

Thioctic acid (0.149 g, 0.72 mmol) was dissolved in dry DMF (7 mL). EDCl (0.157 g, 0.82 mmol) was then added in one portion to the reaction mixture followed by DMAP (0.096 g, 0.79 mmol). The reaction was stirred for 1 h. at 0 oC under a nitrogen atmosphere. A solution of N-(10)-hydroxyhexyl flavin (0.195 mg, 0.57 mmol) in dry DMF (40 mL) was added. The resulting mixture was stirred for 3 h. at 0 oC under a nitrogen atmosphere before being stirred at room temperature for 4 days. The solvent was then removed under reduced pressure. The residue was then dissolved in DCM, extracted with H2O (2 x 75 mL), washed with a saturated solution of sodium bicarbonate (2 x 75 mL), followed by brine (2 x 75 mL). The residue was then purified using column chromatography (silica gel, acetone/ethyl acetate, 20:80 v/v). The product was isolated as a yellow solid (0.186g, 0.35mmol, 47%).

Mpt. = 120-123 oC.

δH (200 MHz, CDCl3): 8.50 (1H, s), 8.00 (1H, s), 7.32 (1H, s), 4.63 (2H, t, J = 8.7 Hz), 4.01 (2H, t, J = 6.23 Hz), 3.49 (1H, m), 3.05 (2H, m), 2.51 (3H, m), 2.39 (3H, s), 2.39 (1H, m), 2.25 (2H, t, J = 7.06 Hz), 1.81 (1H + 2H, m), 1.57 (8H, m), 1.42 (4H, m).

MS (EI) m/z = 530 (M+).

IR (KBr disk): 3427, 3155, 3102, 3026, 2932, 2856, 1719, 1656, 1577, 1592, 1461, 1247 cm-1.

C26H34N4O4S2 requires C, 58.87; H, 6.42; N, 10.56 %. Found C, 58.92; H, 6.46; N, 10.50 %.

**Methylation of N-(10)-hydroxyhexyl flavin.**

Sodium carbonate (0.352 g, 3.28 mmol) was added to a mixture of N-(10)-hydroxyhexyl flavin (0.349 g, 1.02 mmol) and methyliodide (0.280 g, 1.97 mmol) in dry DMF (50 mL). The mixture was then stirred at room temperature under a nitrogen atmosphere for 48 h. The solution was filtered, concentrated and purified using column chromatography (silica gel, ethyl acetate followed by ethyl acetate/ methanol 90:10, v/v). The pure product was a yellow/orange solid (0.239g, 0.67mmol, 66%).

Mpt. = 235-238 oC.

δH (200 MHz, DMSO): 7.89 (1H, s), 7.78 (1H, s), 4.56 (2H, br t, J = 7.5 Hz), 4.37 (1H, t, J = 5.19 Hz), 3.39 (2H, m), 3.25 (3H, s), 2.50 (3H, s), 2.37 (3H, s), 1.69 (2H, m), 1.39 (6H, m).

MS (EI) m/z for C19H24N4O3. [M+H]calc. = 357.1926, found. 357.1926.

IR (KBr disk): 3446, 2925, 2854, 1712, 1638, 1582, 1548, 1460, 1428, 1348 cm-1.

**Synthesis of compound 4**

Thioctic acid (0.019 g, 0.093 mmol) was dissolved in dry DMF (7 mL). EDCl (0.019 g, 0.093 mmol) was then added in one portion to the reaction mixture followed by DMAP (0.012 g, 0.093 mmol). This mixture was stirred for 1 h. at 0 oC under a nitrogen atmosphere, then a solution of N(3)-methyl-N-(10)-hydroxyhexyl flavin (0.030 mg, 0.084 mmol) in dry DMF (5 mL) was added. The resulting mixture was stirred for 3 h. at 0 oC under a nitrogen atmosphere before being stirred at room temperature for 4 days. The solvent was then removed under reduced pressure and the residue was then dissolved in DCM, extracted with H2O (2 x 75 mL), washed with a saturated solution of sodium bicarbonate (2 x 75 mL), followed by brine (2 x 75 mL). The residue was then purified using column chromatography (silica gel, acetone/DCM, 20:80 v/v). The residue obtained was an orange sticky solid (0.024g, 0.045mmol, 54%). Mpt. = 140-142 oC.

δH (400 MHz, CDCl3): 7.99 (1H, s), 7.31 (1H, s), 4.62 (2H, br t, J = 6.76 Hz), 4.01 (2H, t, J = 6.62 Hz), 3.55 (1H, m), 3.48 (3H, s), 3.05 (2H, m), 2.49 (3H, s), 2.38 (3H, s), 2.38 (1H, m), 2.24 (2H, t, J = 7.50 Hz), 1.85 (1H, m), 1.60 (8H, m), 1.40 (6H, m).

MS (EI) m/z = 567 (M+23).

IR (KBr disk): 2918, 1731, 1698, 1654, 1584, 1546, 1461, 1271, 1175 cm-1.

C27H36N4O4S2 requires C, 59.56; H, 6.62; N, 10.29 %. Found C, 59.52; H, 6.56; N, 10.50 %.
